# Supplementary material for: Characterizing lead-rich particles in Beijing's atmosphere following coal-to-gas conversion: insights from single-particle aerosol mass spectrometry
Source: Copernicus journal article supplement (doi:10.5194/acp-25-8891-2025), 2025-08-14
Supplement: Supplementary file 1 [file acp-25-8891-2025-supplement.pdf]

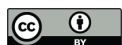

*Supplement of*

**Characterizing lead-rich particles in Beijing's atmosphere following coal-to-gas conversion: insights from single-particle aerosol mass spectrometry**

**Xiufeng Lian et al.**

*Correspondence to:* Mei Li (limei@jnu.edu.cn)

The copyright of individual parts of the supplement might differ from the article licence.

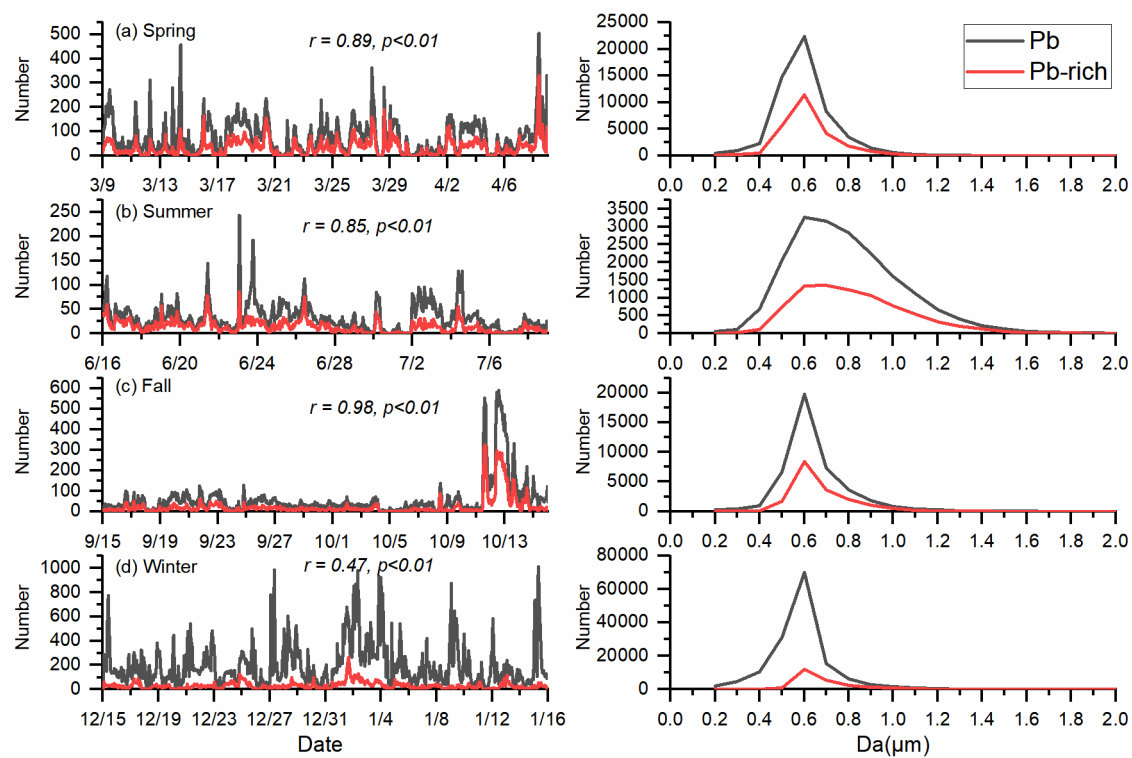

**Figure S1. Time series and size distribution of Pb-containing particles and Pb-rich particles**

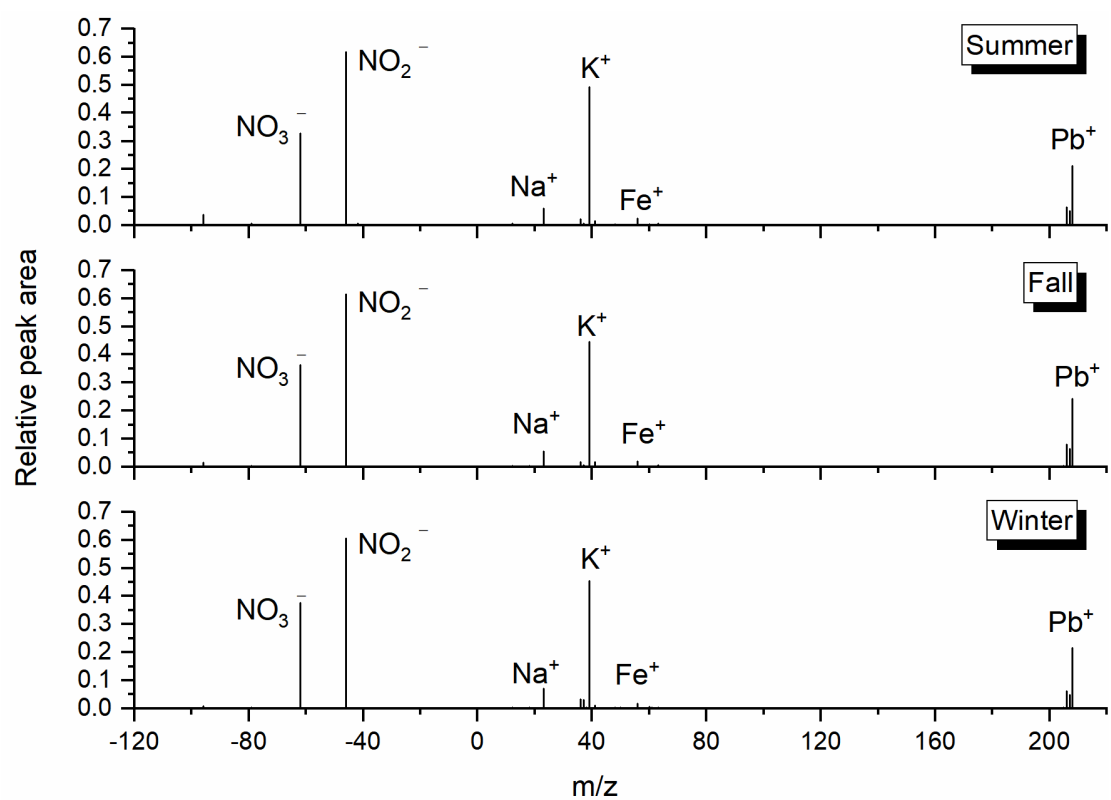

Figure S2. The average mass spectrum of Pb-N particles from summer to winter in 2019.

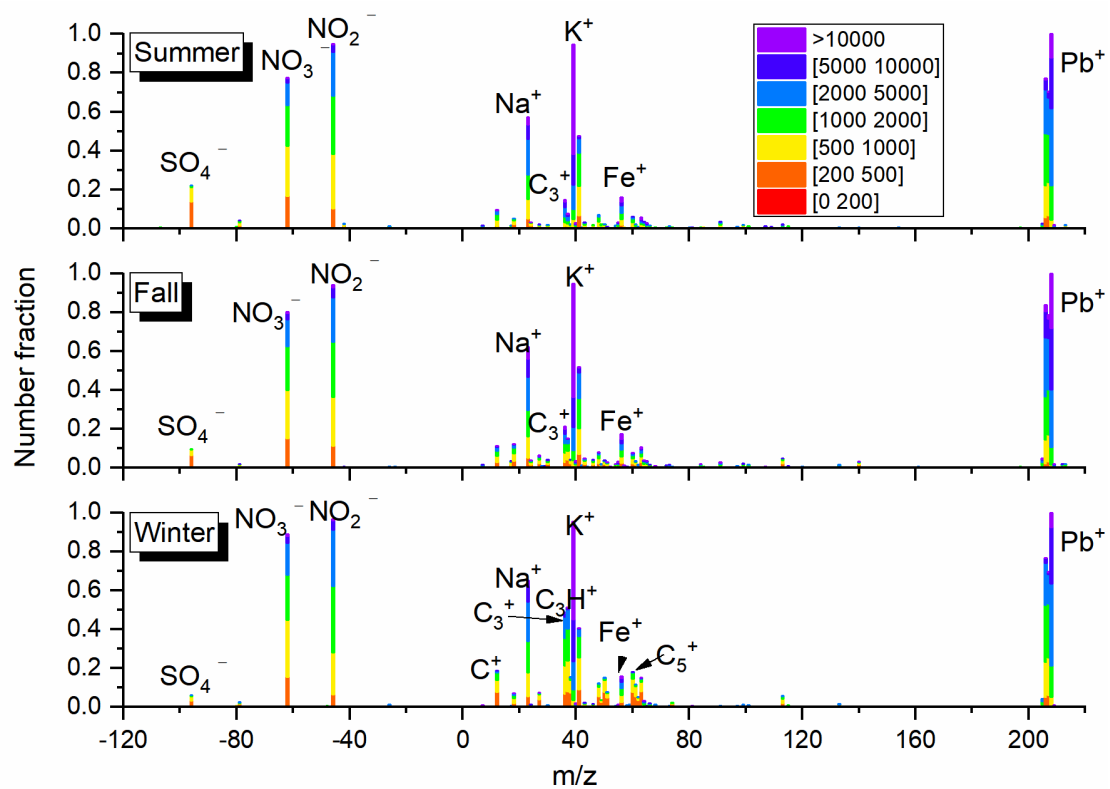

Figure S3. The digital spectrum of Pb-N particles from summer to winter in 2019.

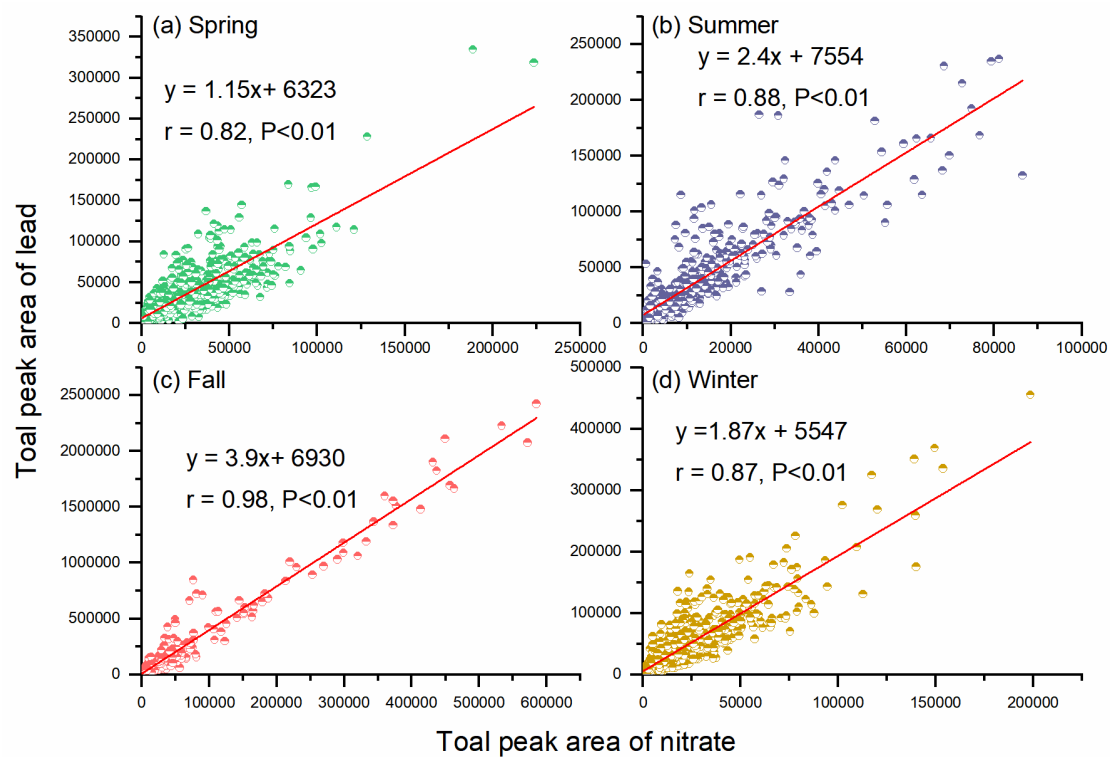

**Figure S4. Correlation between the total peak area of nitrate (sum peak area of m/z -46 and -62) and the**  
**total peak area of lead (sum peak area of m/z 206, 207, and 208) in Pb-N particles.**

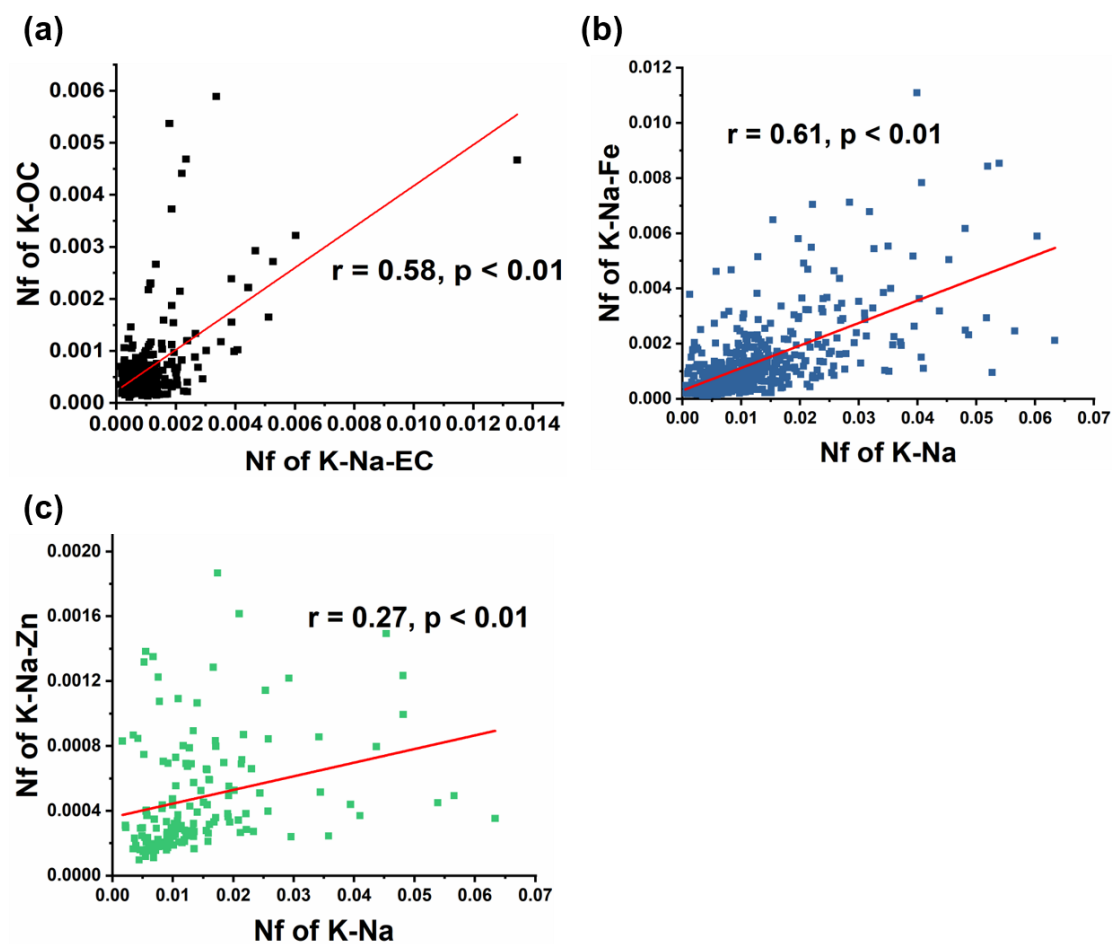

Figure S5. Correlation between the number fractions of K-Na-EC and KOC particles (a), K-Na and K-Na-Fe particles (b), K-Na and K-Na-Zn particles (c).

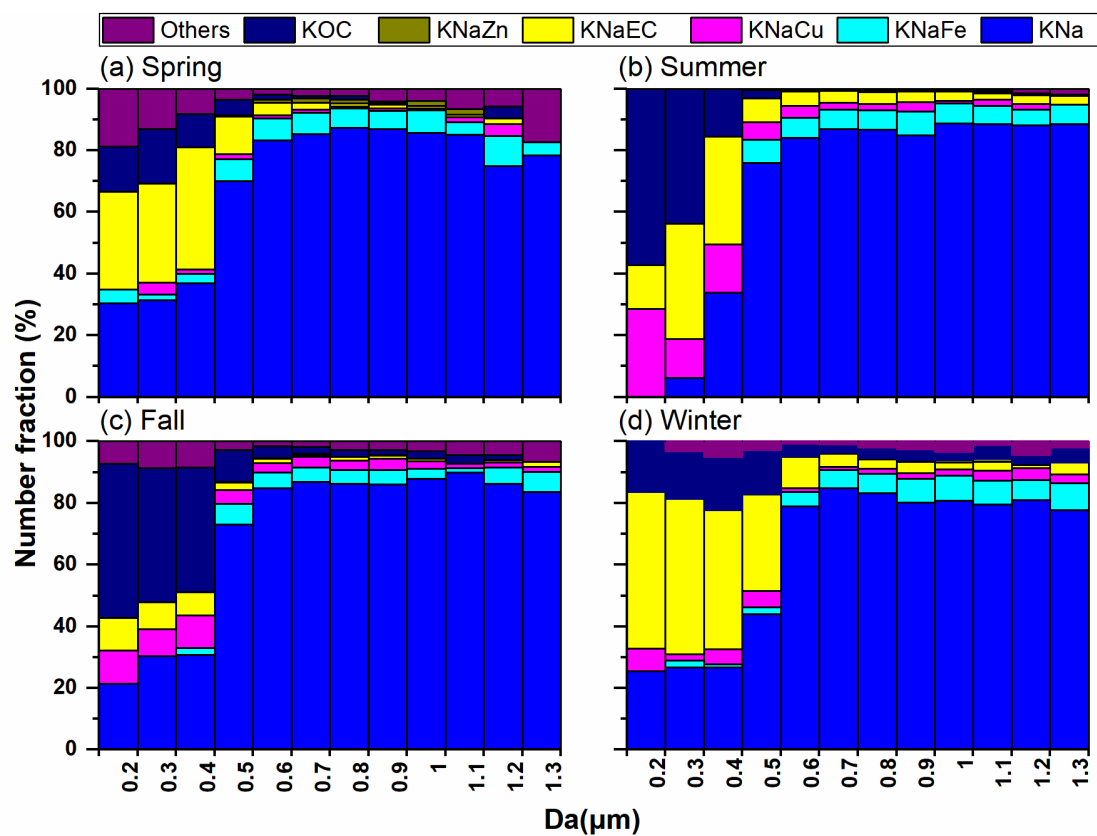

40

Figure S6. Number fractions for size distribution of the main Pb-rich particle types classified based on positive spectrum from spring to winter, respectively.

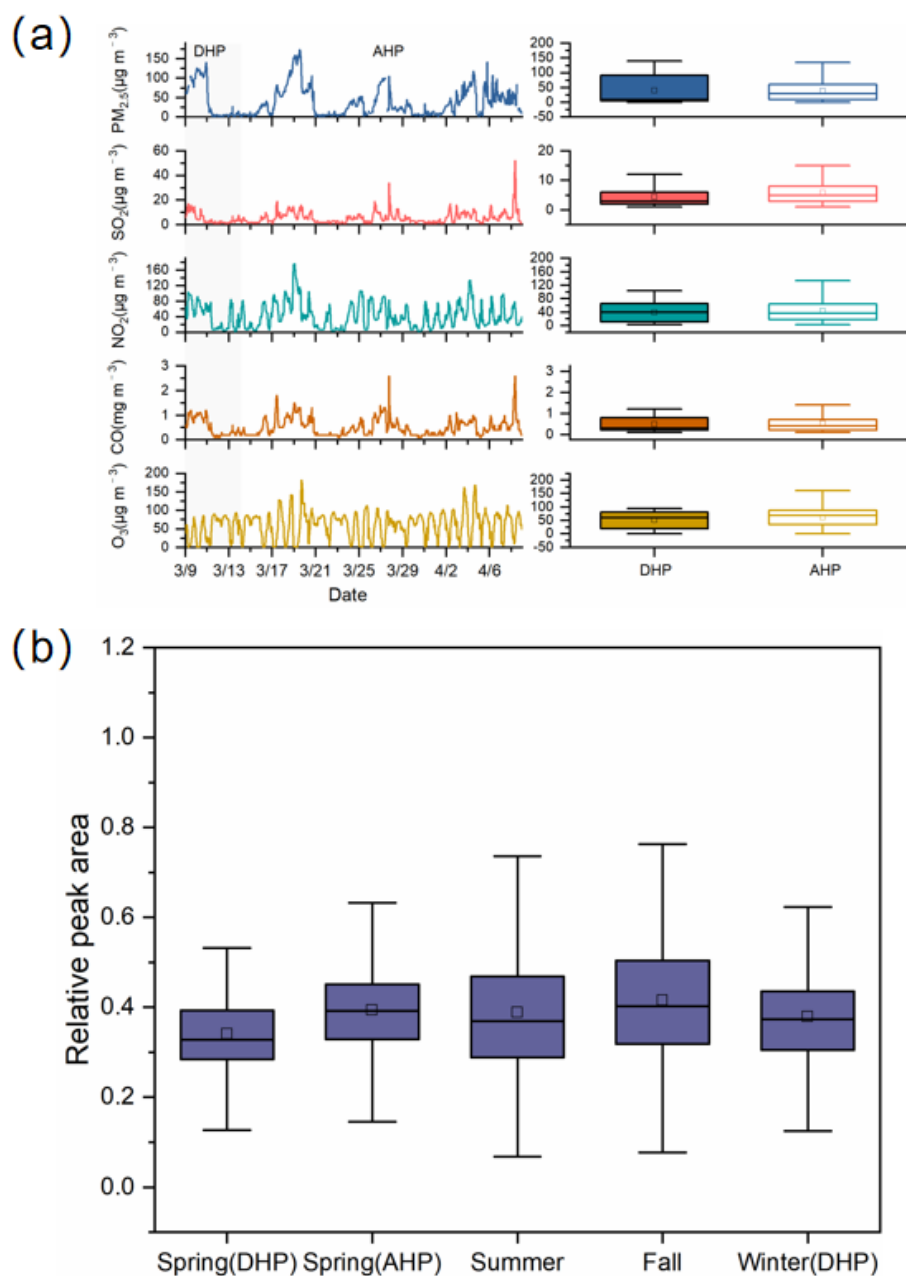

45 **Figure S7. (a) Time series of pollutant concentrations ( $\text{PM}_{2.5}$ ,  $\text{NO}_2$ ,  $\text{SO}_2$ ,  $\text{CO}$ , and  $\text{O}_3$ ) and box plots of pollutant concentrations during heating (DHP) and non-heating (AHP) periods during spring; (b) The relative peak area of Pb in Pb-rich particles during four seasons.**



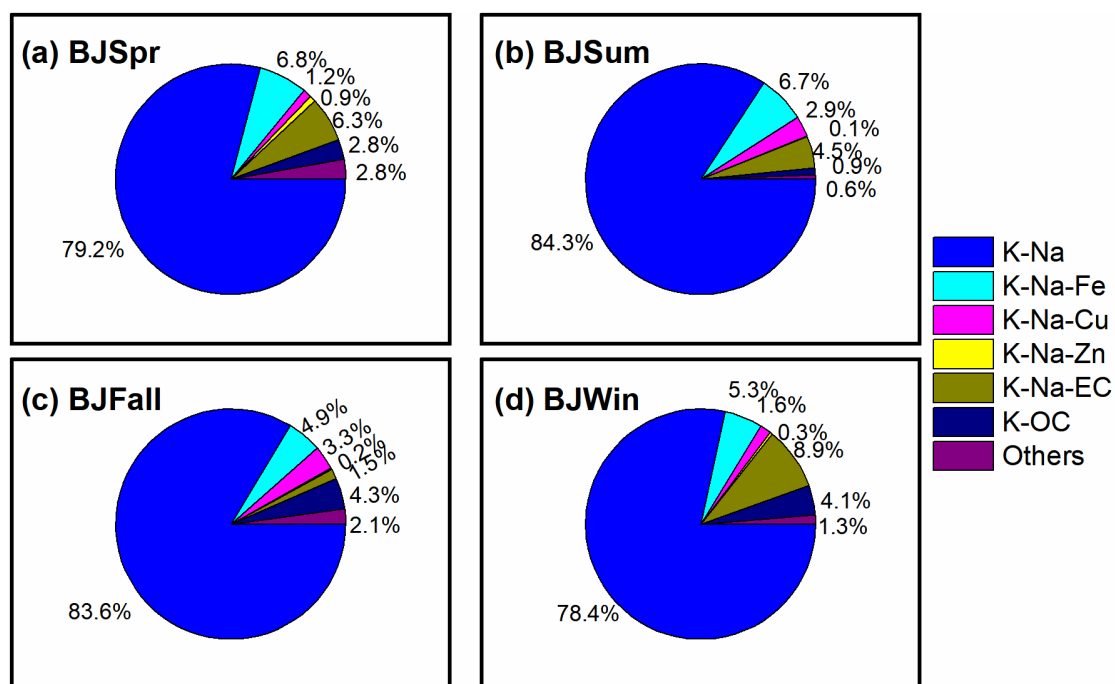

50 Figure S8. The number fractions of the main Pb-rich particle types from spring to winter in 2019.

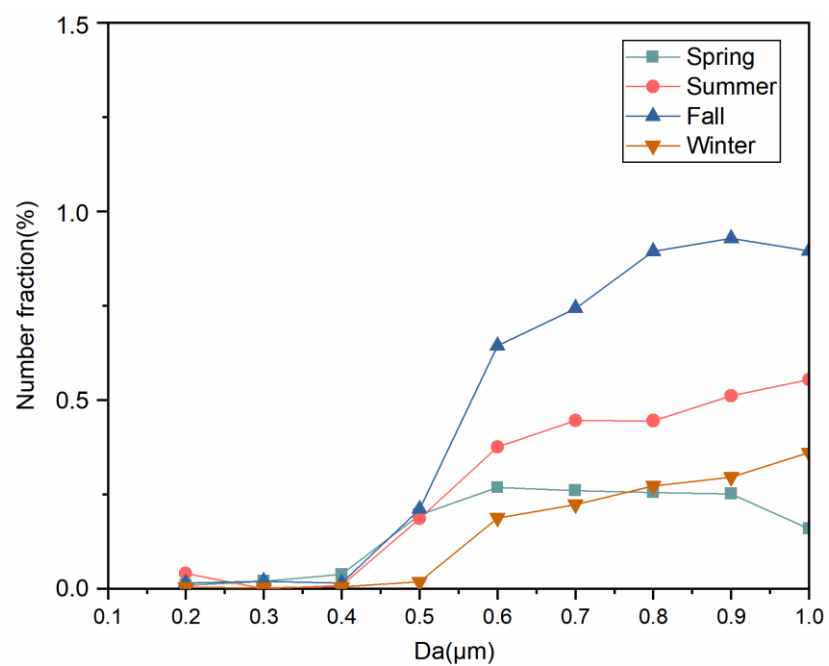

Figure S9. Number fractions for size distribution of Pb-N particles from spring to winter, respectively.

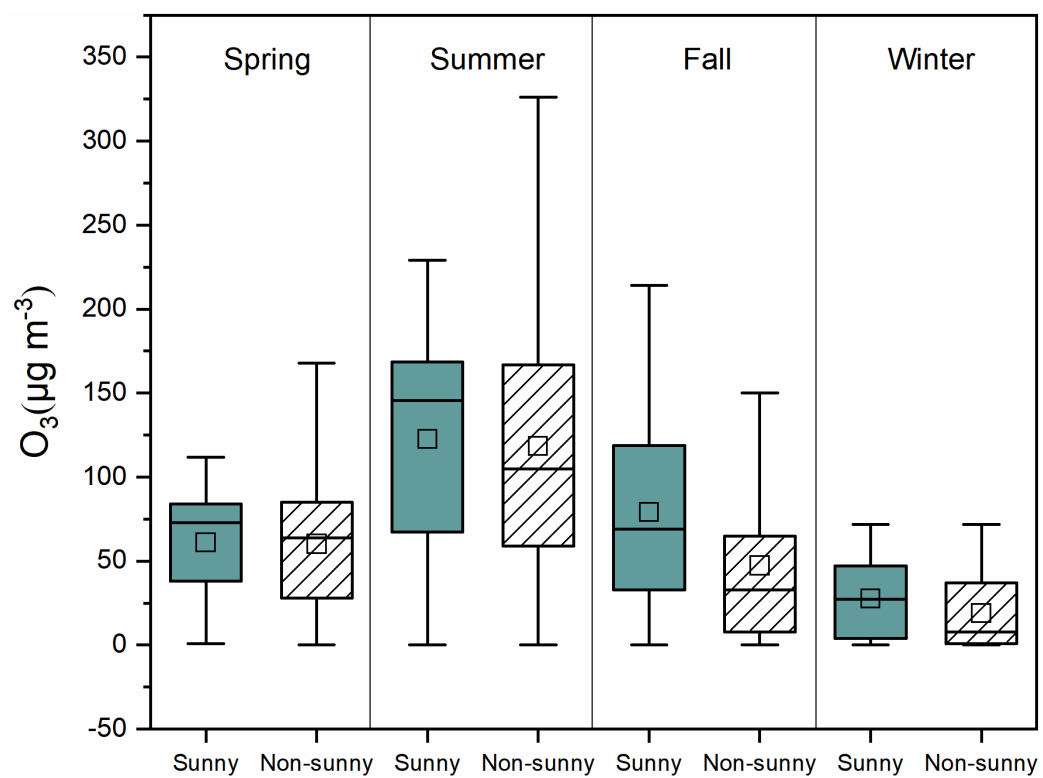

**Figure S10. The ozone concentration on sunny and non-sunny days during four seasons.**

**Table S1 Average value and standard deviation of meteorological parameters and the concentration of pollutants during sampling periods.**

| Site | Date                    | SO <sub>2</sub>      | NO <sub>2</sub> | O <sub>3</sub> | PM <sub>2.5</sub> | T      | RH      | WS    |
|------|-------------------------|----------------------|-----------------|----------------|-------------------|--------|---------|-------|
|      |                         | (μg/m <sup>3</sup> ) |                 |                |                   | (°C)   | (%)     | (m/s) |
|      | 9 Mar-8 Apr 2019        | 6 ± 5                | 45 ± 32         | 62 ± 37        | 41 ± 37           | 12 ± 5 | 29 ± 14 | 2 ± 2 |
|      | 16 Jun-17 Jul 2019      | 4 ± 3                | 32 ± 19         | 119 ± 75       | 33 ± 21           | 27 ± 5 | 56 ± 19 | 2 ± 1 |
|      | 15 Sep-16 Oct 2019      | 4 ± 4                | 41 ± 22         | 59 ± 56        | 35 ± 26           | 19 ± 6 | 61 ± 21 | 1 ± 1 |
|      | 15 Dec 2019-15 Jan 2020 | 6 ± 5                | 49 ± 30         | 24 ± 23        | 36 ± 32           | -1 ± 3 | 49 ± 20 | 2 ± 1 |
